# Supplementary material for: Detection of six soil-transmitted helminths in human stool by qPCR- a systematic workflow
Source: PubMed Central journal article supplement (PMC8483301; doi:10.1371/journal.pone.0258039), 2021-09-30
Supplement: pone.0258039.s002.pdf [file pone.0258039.s002.pdf]

|                                      |                    | 1 cycle 40 s |       |       | 2 cycles of 40 s |       |       | 3 cycles of 40 s |       |       | 4 cycles of 30 s |       |       |
|--------------------------------------|--------------------|--------------|-------|-------|------------------|-------|-------|------------------|-------|-------|------------------|-------|-------|
| <i>Strongyloides<br/>stercoralis</i> | FastPrep-24™ 5G    | 27.72        | 27.59 | 27.53 | 26.9             | 26.66 | 26.99 | 27.19            | 27.16 | 27.3  | 26.08            | 25.87 | 26.11 |
|                                      | Mini-Beadbeater-24 | 27.05        | 26.96 | 26.96 | 27.67            | 27.66 | 27.53 | 26.62            | 27.49 | 27.74 | 26.85            | 26.78 | 26.98 |
|                                      |                    |              |       |       |                  |       |       |                  |       |       |                  |       |       |
| <i>Ascaris<br/>lumbricoides</i>      | FastPrep-24™ 5G    | 32.62        | 32.66 | 32.97 | 32.42            | 32.1  | 31.43 | 32.54            | 32.01 | 31.68 | 32.31            | 32.26 | 32.56 |
|                                      | Mini-Beadbeater-24 | 32.18        | 32.34 | 32.35 | 32.69            | 32.9  | 32    | 33.7             | 32.9  | 33.26 | 32.36            | 32.88 | 32.76 |
