# Supplementary material for: Detection of six soil-transmitted helminths in human stool by qPCR- a systematic workflow
Source: PubMed Central journal article supplement (PMC8483301; doi:10.1371/journal.pone.0258039), 2021-09-30
Supplement: pone.0258039.s003.pdf [file pone.0258039.s003.pdf]

**S2 Table. The gBlock gene sequences used in this study.**

|   | gBlock® gene                      | Sequence                                                                                                                                                                                                                                                                                                                                             |
|---|-----------------------------------|------------------------------------------------------------------------------------------------------------------------------------------------------------------------------------------------------------------------------------------------------------------------------------------------------------------------------------------------------|
| 1 | Vertebrate mitochondrial 16S rRNA | ATTCTAGAGTCCATATCAACAATAGGGTTTACGACCTCGATGTTGGATCAGGAC<br>ATCCCGATGGTGCAGCCGCTATTAAGGTTTCGTTTGTTC AACGATTAAGTCCTA<br>CGTGATCTGAGTTCAGACCCGGAGTAATCCAGGTCGGTTTCTATCTACTTCA                                                                                                                                                                            |
| 2 | <i>S. stercoralis</i>             | TACGTA ACTGGGAATGAAAATTGCAATTATTTTTTCATGAACGAGGAATTCCAAG<br>TAAACGTAAGTCATTAGCTTACATTGATTACGTC CCTGCCCTTGTACACACCCGG<br>CCGTGCTGCCCGGAACTGAGCAATATCCAGAGGCAGGAAGAGATGTAATAAA<br>TTTTTAATTTTTTTATATTAATCCCTTCCAATCGCTGTTGTTTGAACCCGGGCAA<br>AGTCGTAACAAGGTTTTTCGTAGGTGAACCTGCAGAAGGATCATCA                                                            |
| 3 | <i>T. trichiura</i>               | ATGTTGGTGAATCGGAATAACTATGCTGATCGCACGGTCCAGTACCGGCGACGA<br>TGCTTTGAAACGACTTGCTCATCACTTTCGATGGTACGCTACGTGCTTACCATG<br>GTGACAACGGTTAACGGAGAATCAGGGTTCGGCTCCGGAGAGGGAGCCTGAGA<br>AACGGCTACCACATCCAAGGAAGGCAGCAGGCACGCAAATTACCCACTCCAG<br>AT                                                                                                              |
| 4 | <i>A. lumbricoides</i>            | TTCCGTAGGTGAACCTGCGGAAGGATCATTATCGAGCAGAAAAAAAAAAGTCT<br>CCGAACGTGCACATAAGTACTATTTGCGCGTATACGTGAGCCACATAGTAAATT<br>GCACACAAATGTGGTGATGTAATAGCAGTCGGCGGTTTCTTTTTTTTTGGCGGAC<br>AATTGCATGCGATTTGCTATGTGTTGAGGGAGAATAGGTGGCATGTTGGGCTTG<br>TTAGAAAGGCATGCCGCTAGCGCTTATTTCCCGCTATTTTCGTAACAACGGTGTC<br>CATTTTGGCGTCTACGCTTACCAGAGCTATCGCTGGACCGTCCGGTAGC |
| 5 | <i>A. duodenale</i>               | TTGTGCAAGCCTTATGGTTCCTTTGATCCTGAGAAACCAACGTGCTAGTCTTAC<br>GACTTTGTGCGGAAGGTTGGGAGTATCGCCCCCGTTATAGCCCTACGTAAGGT<br>GTCTATGTGCAGCAAGAGTCGTTACTGGGTGACGGCAGTGATTGCTGTGCGAAG<br>TTCGCGTTTCGCTGAGCTTTAGACTTGATGAGCATTGCATGAATGCCGCCTTACT<br>GCTTGTG                                                                                                      |
| 6 | <i>A. ceylanicum</i>              | CGTGCTAGTCTTCAGGACTTTGTGCGGAAGGTTGGGAGTATCGCCCCCGTTAC<br>AGCCCTACGTGAGGTGTCTATGTGCAGCAAGAGCCGTTCTGGGTGGCGGCAGT<br>GATTGCTGTGCGAAGTTCGCGTTTCGCTGAGCTTTAGACTTGATGAGCATTGCAT<br>GAATGCCGCCTTACTGCTTGTGTTGGTGGTTGAGCA                                                                                                                                    |
| 7 | <i>N. americanus</i>              | AACGATAATACTACAGTGTAGCTTGTGGACAGTACTCTCACCAGTATTGTGCA<br>ACACTGTTTGTGCAACGGTACTTGCTCTGTACTACGCATTGTATACGTGTTACAGC<br>AATTCCCGTTTAAAGTGAAGAACACACGTGCAACATGTGCACGCTGTTATCACT<br>ACGTTAGTTGCTAGTTTACTAACGTATGATAGCGGTGCATACTGTATGACATGA<br>ACATATCGTT                                                                                                  |
| 8 | Equine herpesvirus type 4         | GACGATGATGACACTAGCGACTTCGATGAAGCCAAGCTGGAGGAGGCACGCGA<br>AATGATCAAATATATGTCTATGGTTTCTGCCCTGGAAAAACAGGAAAAAAAGGC<br>AATGAAGAAAAACAAGGGGGTTGGACTTATTGCCAGCAACGTTTCAAACCTCG                                                                                                                                                                             |
