# Supplementary material for: Detection of six soil-transmitted helminths in human stool by qPCR- a systematic workflow
Source: PubMed Central journal article supplement (PMC8483301; doi:10.1371/journal.pone.0258039), 2021-09-30
Supplement: pone.0258039.s004.pdf [file pone.0258039.s004.pdf]

| Mt 16S<br>rRNA<br>qPCR | STH1 quantification cycle  |                           |                         | STH2 quantification cycle |                          |                          | Kato-Katz result                                                   |
|------------------------|----------------------------|---------------------------|-------------------------|---------------------------|--------------------------|--------------------------|--------------------------------------------------------------------|
|                        | <i>A.<br/>lumbricoides</i> | <i>S.<br/>stercoralis</i> | <i>T.<br/>trichiura</i> | <i>A.<br/>duodenale</i>   | <i>A.<br/>ceylanicum</i> | <i>N.<br/>americanus</i> |                                                                    |
| C <sub>q</sub>         |                            |                           |                         |                           |                          |                          | Species (EPG)                                                      |
| 23.3                   |                            |                           |                         |                           |                          | 34.19                    | Hookworm (36)                                                      |
| 18.9                   |                            |                           |                         |                           |                          |                          | Negative                                                           |
| 17.4                   |                            |                           |                         |                           |                          | 26.54                    | Hookworm (312)                                                     |
| 18.9                   |                            |                           |                         |                           |                          |                          | Negative                                                           |
| 21.0                   |                            |                           |                         |                           |                          |                          | Negative                                                           |
| 19.3                   |                            |                           |                         |                           |                          |                          | <i>Trichuris</i> (144)                                             |
| 20.4                   |                            |                           |                         |                           |                          |                          | Hookworm (36)                                                      |
| 16.9                   | 36.77                      |                           |                         |                           |                          | 34.75                    | <i>Ascaris</i> (300),<br>hookworm (300),<br><i>Trichuris</i> (204) |
| 18.5                   |                            |                           |                         |                           |                          | 26.47                    | Negative                                                           |
| 20.0                   |                            |                           |                         |                           | 31.27                    |                          | Negative                                                           |
| 21.3                   |                            |                           |                         |                           |                          |                          | Negative                                                           |
| 20.2                   |                            |                           |                         |                           |                          |                          | Negative                                                           |
| 18.6                   | 29.7                       |                           |                         |                           |                          | 29.38                    | <i>Ascaris</i> (624),<br>hookworm (228)                            |
| 19.2                   |                            |                           |                         |                           |                          |                          | Negative                                                           |
| 24.0                   |                            |                           |                         |                           |                          |                          | Negative                                                           |
| 21.0                   |                            |                           |                         |                           |                          |                          | Negative                                                           |
| 17.3                   |                            |                           |                         |                           |                          | 28.59                    | Negative                                                           |
| 19.4                   | 29.61                      |                           |                         |                           |                          | 27.88                    | Negative                                                           |
| 17.9                   |                            |                           |                         |                           |                          |                          | <i>Trichuris</i> (48)                                              |
| 18.5                   |                            |                           |                         |                           |                          |                          | <i>Ascaris</i> (396),<br>hookworm (600)                            |
| 18.0                   |                            |                           |                         |                           |                          |                          | <i>Ascaris</i> (120),<br><i>Trichuris</i> (384)                    |
| 19.9                   |                            |                           |                         |                           |                          |                          | <i>Trichuris</i> (48)                                              |
| 20.7                   |                            |                           |                         |                           |                          |                          | Negative                                                           |
| 17.4                   |                            |                           |                         |                           | 28.64                    |                          | Hookworm (72)                                                      |
| 20.2                   |                            |                           |                         |                           |                          |                          | Hookworm (96)                                                      |
| 21.8                   |                            |                           |                         |                           |                          |                          | Negative                                                           |
| 19.8                   |                            |                           |                         |                           |                          |                          | Negative                                                           |
| 20.4                   |                            |                           |                         |                           | 28.39                    | 33.78                    | Hookworm (636)                                                     |
| 19.8                   |                            |                           |                         |                           | 31.44                    |                          | Negative                                                           |
| 17.5                   |                            |                           |                         |                           |                          |                          | Negative                                                           |
| 17.8                   |                            |                           |                         |                           |                          |                          | Negative                                                           |
| 21.2                   | 36.22                      | 35.09                     |                         |                           |                          |                          | <i>Ascaris</i> (108)                                               |
| 19.2                   |                            |                           |                         |                           | 30.09                    |                          | Negative                                                           |
| 19.3                   | 32.95                      |                           |                         |                           |                          |                          | <i>Ascaris</i> (336)                                               |
| 20.0                   |                            |                           |                         |                           | 22.68                    |                          | Negative                                                           |
| 20.4                   |                            |                           |                         |                           | 31.42                    |                          | Negative                                                           |

| Mt 16S<br>rRNA<br>qPCR | STH1 quantification cycle |                          |                        | STH2 quantification cycle |                         |                         | Kato-Katz result       |
|------------------------|---------------------------|--------------------------|------------------------|---------------------------|-------------------------|-------------------------|------------------------|
|                        | A.<br><i>lumbricoides</i> | S.<br><i>stercoralis</i> | T.<br><i>trichiura</i> | A.<br><i>duodenale</i>    | A.<br><i>ceylanicum</i> | N.<br><i>americanus</i> |                        |
| C <sub>q</sub>         |                           |                          |                        |                           |                         |                         | Species (EPG)          |
| 20.5                   |                           |                          |                        |                           |                         |                         | <i>Trichuris</i> (192) |
| 22.3                   |                           |                          |                        |                           |                         |                         | Negative               |
| 21.2                   | 30.12                     |                          |                        |                           |                         |                         | <i>Ascaris</i> (1224)  |
| 20.2                   | 31.12                     |                          |                        |                           |                         |                         | <i>Ascaris</i> (144)   |
